# Supplementary material for: Observation of the Gut Microbiota Profile in BALB/c Mice Induced by Plasmodium yoelii 17XL Infection
Source: Front Microbiol. 2022 Mar 31;13:858897. doi: 10.3389/fmicb.2022.858897 (PMC9009211; doi:10.3389/fmicb.2022.858897)
Supplement: Supplementary file 1 [file Table_1.XLSX]

## Sheet: Supplementary table 1
Supplementary Table 1 | Within- versus Among-Group Dissimilarities analysis via Analysis of Similarities (ANOSIM)
Group	R-value	P-value
PyD2-Ctrl	0.2386	0.002
PyD5-Ctrl	0.1739	0.004
PyD5-PyD2	0.3018	0.002
Note: R-value is between (-1, 1), and when the R-value is greater than 0, it indicates significant differences between groups. The credibility of the statistical analysis is expressed by the P-value, and P < 0.05 indicates statistical significance. Significance < 0.05 indicates a significant difference.

## Sheet: Supplementary table 2
Supplementary Table 2 | Within- versus Among-Group Dissimilarities analysis via the Multi Response Permutation Procedure (MRPP)
Group	A	observed-delta	expected-delta	Significance
Ctrl-PyD5	0.03178	0.384	0.3966	0.005
PyD2-PyD5	0.06291	0.3967	0.4234	0.001
Ctrl-PyD2	0.05011	0.4008	0.422	0.004
Note: A smaller value of the observed delta indicates that the difference within the group is lower; a larger value of the expected delta indicates that the difference between the groups is higher; A > 0 demonstrates that the difference between the groups is higher than that within the groups; A < 0 indicates that the difference within the groups is higher than that between the groups. p < 0.05 i…
